# Supplementary material for: Baseline Elevated Serum Angiopoietin-2 Predicts Long-Term Non-Regression of Liver Fibrosis After Direct-Acting Antiviral Therapy for Hepatitis C
Source: Research Square preprint supplement (doi:10.21203/rs.3.rs-143428/v1), 2021-01-14
Supplement: Supplementary file 1 [file 4c9792e429c1a93746d11ffc.docx]

**Supplementary Material**

**Baseline elevated serum angiopoietin-2 predicts long-term non-regression of liver fibrosis after direct-acting antiviral therapy for hepatitis C**

Short title: Ang2 and liver fibrosis after SVR

Naoki Kawagishi1¶, Goki Suda1¶*, Megumi Kimura1, Osamu Maehara1, Ren Yamada¹, Yoshimasa Tokuchi 1, Akinori Kubo1, Takashi Kitagataya¹, Taku Shigesawa1, Kazuharu Suzuki1, Masatsugu Ohara1, Masato Nakai1, Takuya Sho1, Mitsuteru Natsuizaka1, Kenichi Morikawa1, Koji Ogawa1, Yusuke Kudo2, Mutsumi Nishida2, and Naoya Sakamoto1

**Table of Contents:**

**Supplementary Figure 1. Study design**
